# Supplementary material for: Urban greenspace and anxiety symptoms during the COVID-19 pandemic: A 20-month follow up of 19,848 participants in England
Source: bioRxiv or medRxiv preprint supplement (doi:10.1101/2022.04.27.22274371), 2022-05-02
Supplement: Supplementary file [file media-1.pdf]

## Supplementary Material

Table S1 Results from the latent growth models with both quantity and quality measures of greenspace (N=12,570)

|                       | Model I      |             |              | Model II     |             |              | Model III    |             |              |
|-----------------------|--------------|-------------|--------------|--------------|-------------|--------------|--------------|-------------|--------------|
|                       | Coef.        | SE          | p            | Coef.        | SE          | p            | Coef.        | SE          | p            |
| <b>Greenspace:</b>    |              |             |              |              |             |              |              |             |              |
| Intercept             |              |             |              |              |             |              |              |             |              |
| <10-20% (vs. ≤10%)    | <b>-0.70</b> | <b>0.21</b> | <b>0.001</b> | <b>-0.66</b> | <b>0.24</b> | <b>0.006</b> | <b>-0.60</b> | <b>0.22</b> | <b>0.006</b> |
| <20-50% (vs. ≤10%)    | -0.09        | 0.24        | 0.698        | -0.11        | 0.29        | 0.701        | -0.29        | 0.25        | 0.241        |
| >50% (vs. ≤10%)       | -0.35        | 0.21        | 0.097        | -0.51        | 0.38        | 0.174        | <b>-0.75</b> | <b>0.34</b> | <b>0.025</b> |
| Satisfied (vs. other) | <b>-1.38</b> | <b>0.27</b> | <b>0.000</b> | <b>-1.21</b> | <b>0.26</b> | <b>0.000</b> | <b>-0.91</b> | <b>0.22</b> | <b>0.000</b> |
| Slope 1               |              |             |              |              |             |              |              |             |              |
| <10-20% (vs. ≤10%)    | 0.03         | 0.04        | 0.405        | 0.04         | 0.04        | 0.320        | 0.04         | 0.04        | 0.300        |
| <20-50% (vs. ≤10%)    | 0.01         | 0.04        | 0.823        | 0.03         | 0.05        | 0.614        | 0.04         | 0.05        | 0.458        |
| >50% (vs. ≤10%)       | 0.02         | 0.04        | 0.575        | 0.05         | 0.07        | 0.464        | 0.06         | 0.07        | 0.393        |
| Satisfied (vs. other) | -0.03        | 0.04        | 0.496        | -0.03        | 0.04        | 0.508        | -0.02        | 0.05        | 0.665        |
| Slope 2               |              |             |              |              |             |              |              |             |              |
| <10-20% (vs. ≤10%)    | 0.00         | 0.04        | 0.959        | -0.01        | 0.04        | 0.758        | -0.02        | 0.04        | 0.707        |
| <20-50% (vs. ≤10%)    | -0.06        | 0.04        | 0.081        | -0.08        | 0.04        | 0.062        | <b>-0.09</b> | <b>0.04</b> | <b>0.034</b> |
| >50% (vs. ≤10%)       | -0.01        | 0.05        | 0.894        | -0.05        | 0.06        | 0.426        | -0.06        | 0.06        | 0.320        |
| Satisfied (vs. other) | -0.05        | 0.04        | 0.212        | -0.04        | 0.04        | 0.302        | -0.03        | 0.04        | 0.465        |
| Slope 3               |              |             |              |              |             |              |              |             |              |
| <10-20% (vs. ≤10%)    | 0.01         | 0.01        | 0.576        | 0.02         | 0.01        | 0.121        | 0.02         | 0.01        | 0.104        |
| <20-50% (vs. ≤10%)    | 0.00         | 0.01        | 0.920        | 0.02         | 0.01        | 0.111        | 0.02         | 0.01        | 0.116        |
| >50% (vs. ≤10%)       | 0.01         | 0.01        | 0.217        | 0.05         | 0.02        | 0.003        | <b>0.05</b>  | <b>0.02</b> | <b>0.004</b> |
| Satisfied (vs. other) | 0.00         | 0.01        | 0.954        | 0.00         | 0.01        | 0.985        | 0.00         | 0.01        | 0.896        |
| <b>Growth factor:</b> |              |             |              |              |             |              |              |             |              |
| Intercept             | <b>5.20</b>  | <b>0.27</b> | <b>0.000</b> | <b>6.27</b>  | <b>0.54</b> | <b>0.000</b> | <b>6.17</b>  | <b>0.60</b> | <b>0.000</b> |
| Slope 1               | <b>-0.20</b> | <b>0.04</b> | <b>0.000</b> | <b>-0.24</b> | <b>0.09</b> | <b>0.010</b> | <b>-0.35</b> | <b>0.13</b> | <b>0.006</b> |
| Slope 2               | <b>0.46</b>  | <b>0.04</b> | <b>0.000</b> | <b>0.58</b>  | <b>0.10</b> | <b>0.000</b> | <b>0.57</b>  | <b>0.13</b> | <b>0.000</b> |
| Slope 3               | <b>-0.04</b> | <b>0.01</b> | <b>0.008</b> | <b>-0.10</b> | <b>0.03</b> | <b>0.000</b> | <b>-0.08</b> | <b>0.04</b> | <b>0.032</b> |
| <b>Model fit:</b>     |              |             |              |              |             |              |              |             |              |
| RMSEA <sup>†</sup>    | 0.02         |             |              | 0.02         |             |              | 0.01         |             |              |
| CFI <sup>†</sup>      | 0.98         |             |              | 0.98         |             |              | 0.98         |             |              |
| TLI <sup>†</sup>      | 0.98         |             |              | 0.98         |             |              | 0.98         |             |              |
| SRMR <sup>†</sup>     | 0.01         |             |              | 0.01         |             |              | 0.01         |             |              |

Notes: Model I, no covariate; Model II, controlling for population density and index of multiple deprivation; Model III, additionally controlling for individual characteristics; <sup>†</sup>RMSEA, Root Mean Square Error of Approximation; CFI, Comparative Fit Index; TLI, Tucker-Lewis Index; SRMR, Standardised Root Mean Square Residual

Table S2 Results from the latent growth models with alternative measure of greenspace (N=19,848)

|                        | Model III-I |      |       | Model III-II |      |       |
|------------------------|-------------|------|-------|--------------|------|-------|
|                        | Coef.       | SE   | p     | Coef.        | SE   | p     |
| <b>Greenspace:</b>     |             |      |       |              |      |       |
| Intercept              |             |      |       |              |      |       |
| Proximity              | 0.05        | 0.03 | 0.076 | 0.07         | 0.08 | 0.372 |
| Proximity <sup>2</sup> |             |      |       | 0.00         | 0.01 | 0.799 |
| Slope 1                |             |      |       |              |      |       |
| Proximity              | 0.00        | 0.01 | 0.646 | 0.00         | 0.02 | 0.895 |
| Proximity <sup>2</sup> |             |      |       | 0.00         | 0.00 | 0.950 |
| Slope 2                |             |      |       |              |      |       |
| Proximity              | 0.01        | 0.01 | 0.060 | 0.02         | 0.01 | 0.225 |
| Proximity <sup>2</sup> |             |      |       | 0.00         | 0.00 | 0.630 |
| Slope 3                |             |      |       |              |      |       |
| Proximity              | 0.00        | 0.00 | 0.800 | 0.00         | 0.01 | 0.365 |
| Proximity <sup>2</sup> |             |      |       | 0.00         | 0.00 | 0.348 |
| <b>Growth factor:</b>  |             |      |       |              |      |       |
| Intercept              | 5.14        | 0.40 | 0.000 | 5.11         | 0.41 | 0.000 |
| Slope 1                | -0.20       | 0.10 | 0.048 | -0.20        | 0.10 | 0.055 |
| Slope 2                | 0.49        | 0.10 | 0.000 | 0.48         | 0.10 | 0.000 |
| Slope 3                | -0.06       | 0.03 | 0.059 | -0.05        | 0.03 | 0.113 |
| <b>Model fit:</b>      |             |      |       |              |      |       |
| RMSEA <sup>†</sup>     | 0.01        |      |       | 0.01         |      |       |
| CFI <sup>†</sup>       | 0.99        |      |       | 0.99         |      |       |
| TLI <sup>†</sup>       | 0.98        |      |       | 0.98         |      |       |
| SRMR <sup>†</sup>      | 0.01        |      |       | 0.01         |      |       |

Notes: <sup>†</sup>RMSEA, Root Mean Square Error of Approximation; CFI, Comparative Fit Index; TLI, Tucker-Lewis Index; SRMR, Standardised Root Mean Square Residual

Table S3 Results from the latent growth models controlling for days of going outside (N=19,848)

|                       | Model IV     |             |              |
|-----------------------|--------------|-------------|--------------|
|                       | Coef.        | SE          | p            |
| Intercept             |              |             |              |
| <10-20% (vs. ≤10%)    | <b>-0.54</b> | <b>0.18</b> | <b>0.003</b> |
| <20-50% (vs. ≤10%)    | <b>-0.42</b> | <b>0.19</b> | <b>0.027</b> |
| >50% (vs. ≤10%)       | <b>-0.78</b> | <b>0.26</b> | <b>0.003</b> |
| Slope 1               |              |             |              |
| <10-20% (vs. ≤10%)    | 0.04         | 0.04        | 0.268        |
| <20-50% (vs. ≤10%)    | 0.04         | 0.04        | 0.333        |
| >50% (vs. ≤10%)       | 0.06         | 0.06        | 0.310        |
| Slope 2               |              |             |              |
| <10-20% (vs. ≤10%)    | -0.06        | 0.04        | 0.156        |
| <20-50% (vs. ≤10%)    | <b>-0.09</b> | <b>0.04</b> | <b>0.022</b> |
| >50% (vs. ≤10%)       | -0.08        | 0.06        | 0.128        |
| Satisfied (vs. other) |              |             |              |
| Slope 3               |              |             |              |
| <10-20% (vs. ≤10%)    | 0.01         | 0.01        | 0.260        |
| <20-50% (vs. ≤10%)    | 0.01         | 0.01        | 0.570        |
| >50% (vs. ≤10%)       | <b>0.03</b>  | <b>0.02</b> | <b>0.040</b> |
| Going out 1           | 0.00         | 0.01        | 0.791        |
| Going out 2           | <b>-0.05</b> | <b>0.01</b> | <b>0.000</b> |
| Going out 3           | <b>-0.06</b> | <b>0.01</b> | <b>0.000</b> |
| Going out 4           | <b>-0.07</b> | <b>0.01</b> | <b>0.000</b> |
| Going out 5           | <b>-0.09</b> | <b>0.01</b> | <b>0.000</b> |
| Going out 6           | <b>-0.07</b> | <b>0.01</b> | <b>0.000</b> |
| Going out 7           | <b>-0.08</b> | <b>0.01</b> | <b>0.000</b> |
| Going out 8           | <b>-0.11</b> | <b>0.01</b> | <b>0.000</b> |
| Going out 9           | <b>-0.09</b> | <b>0.01</b> | <b>0.000</b> |
| Going out 10          | <b>-0.08</b> | <b>0.01</b> | <b>0.000</b> |
| Going out 11          | <b>-0.08</b> | <b>0.01</b> | <b>0.000</b> |
| Going out 12          | <b>-0.09</b> | <b>0.01</b> | <b>0.000</b> |
| Going out 13          | <b>-0.10</b> | <b>0.01</b> | <b>0.000</b> |
| Going out 14          | <b>-0.11</b> | <b>0.01</b> | <b>0.000</b> |
| Going out 15          | <b>-0.08</b> | <b>0.01</b> | <b>0.000</b> |
| Going out 16          | <b>-0.11</b> | <b>0.01</b> | <b>0.000</b> |
| Going out 17          | <b>-0.09</b> | <b>0.01</b> | <b>0.000</b> |
| Going out 18          | <b>-0.11</b> | <b>0.01</b> | <b>0.000</b> |
| Going out 19          | <b>-0.09</b> | <b>0.01</b> | <b>0.000</b> |
| Going out 20          | <b>-0.07</b> | <b>0.01</b> | <b>0.000</b> |
| <b>Growth factor:</b> |              |             |              |
| Intercept             | <b>6.17</b>  | <b>0.46</b> | <b>0.000</b> |
| Slope 1               | -0.19        | 0.11        | 0.079        |
| Slope 2               | <b>0.63</b>  | <b>0.11</b> | <b>0.000</b> |
| Slope 3               | <b>-0.08</b> | <b>0.03</b> | <b>0.009</b> |

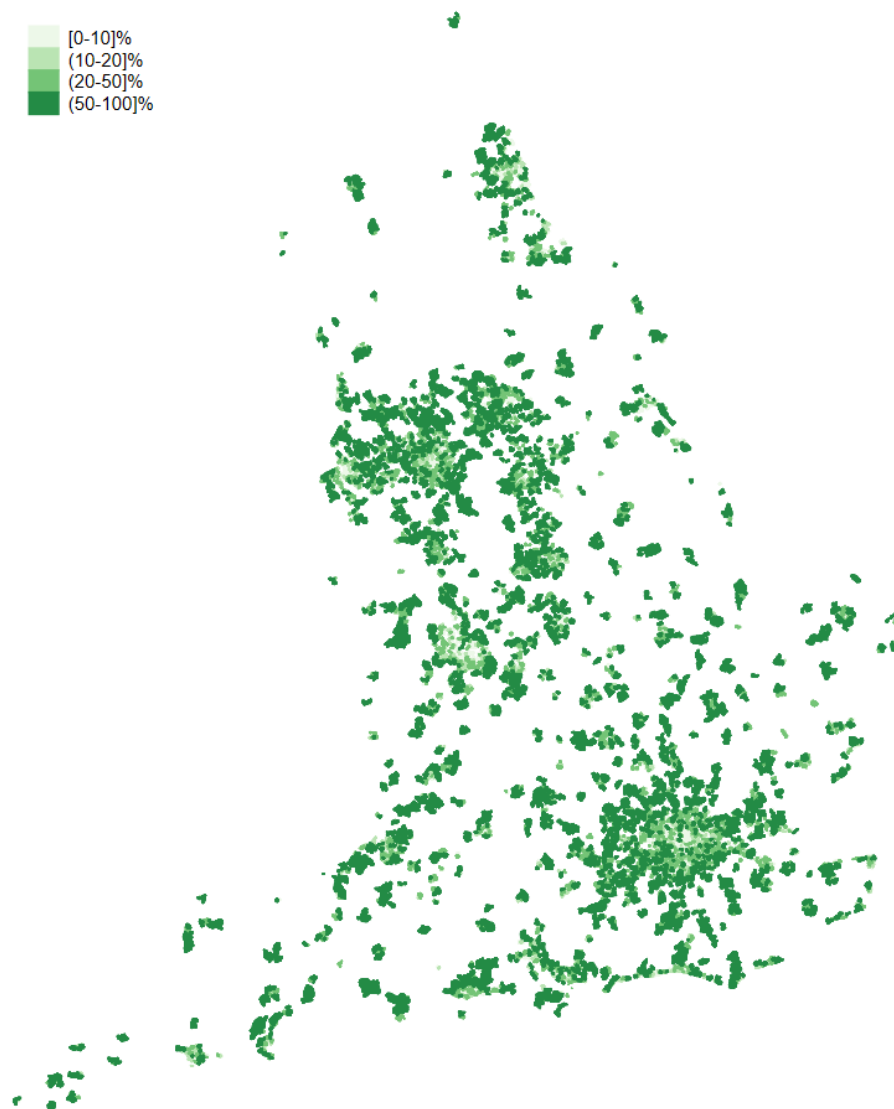

Notes: *Based upon Land Cover Map 2019 © UKCEH 2020. Contains Ordnance Survey data © Crown Copyright 2007, Licence number 100017572.*

Figure S1 Distribution of urban geographic areas that were included in the analyses (categorised by greenspace exposure)

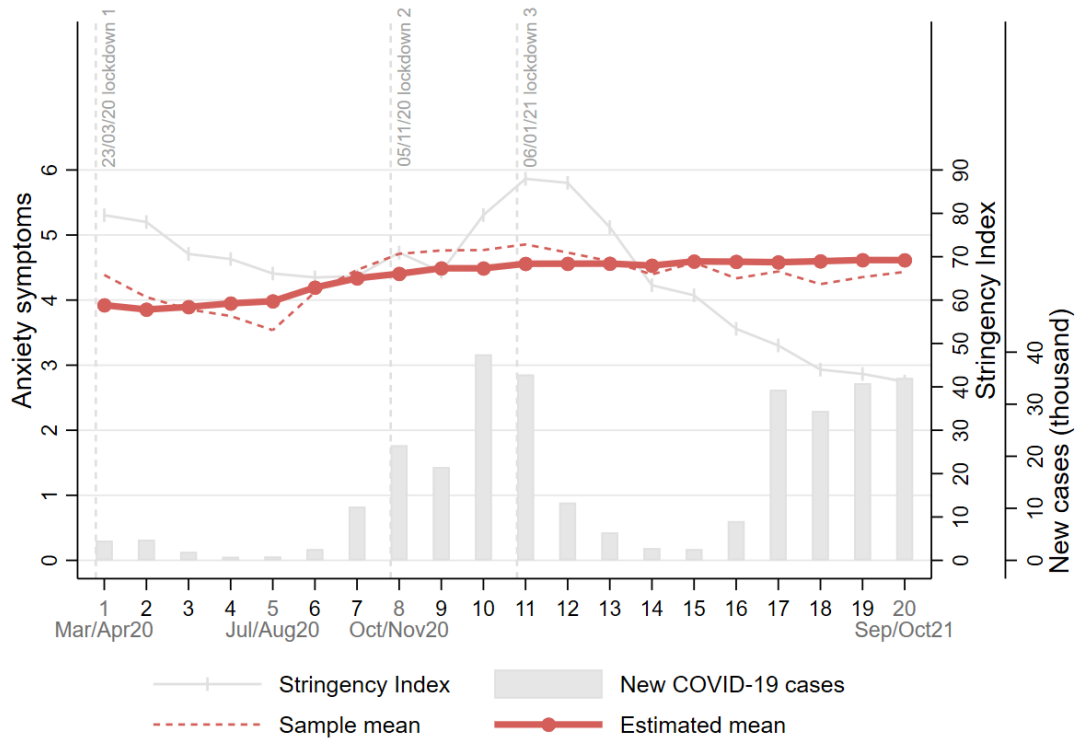

Figure S2 Overall growth trajectories of anxiety symptoms (unconditional model with free time scores)
